# Supplementary material
Source: PubMed Central journal article supplement (PMC5013885)
Supplement: supp_kwv456_kwv456supp.pdf [file supp_kwv456_kwv456supp.pdf]

## Supplementary Materials

**Web Table 1.** Chronic diseases and conditions included and excluded from the multimorbidity weighted index in the pooled Nurses' Health Study, Nurses' Health Study II, and Health Professionals Follow-up Study cohorts from 1992-2008.

|                                                               | Included | Excluded                                                                                                                                                                                                                                                                                                                                                                                                                                                                                                                                                                                                                                                                                                                                                                                                                                                                                                                                                                                                                                                                                                                                                                                                                                                                                                                                                                                                                                                                                                                                                                                                                                                                                                                                                                                                                                                                                                                         |
|---------------------------------------------------------------|----------|----------------------------------------------------------------------------------------------------------------------------------------------------------------------------------------------------------------------------------------------------------------------------------------------------------------------------------------------------------------------------------------------------------------------------------------------------------------------------------------------------------------------------------------------------------------------------------------------------------------------------------------------------------------------------------------------------------------------------------------------------------------------------------------------------------------------------------------------------------------------------------------------------------------------------------------------------------------------------------------------------------------------------------------------------------------------------------------------------------------------------------------------------------------------------------------------------------------------------------------------------------------------------------------------------------------------------------------------------------------------------------------------------------------------------------------------------------------------------------------------------------------------------------------------------------------------------------------------------------------------------------------------------------------------------------------------------------------------------------------------------------------------------------------------------------------------------------------------------------------------------------------------------------------------------------|
| Voluntarily reported acute conditions                         |          | Appendicitis, acute endocarditis, acute myocarditis, acute nephritis, aorta iliac obstruction, aseptic meningitis, acute pericarditis, bacterial endocarditis, bowel obstruction, bursitis, cellulitis, epididymitis, gangrene, Helicobacter pylori infection, hemolytic uremic syndrome, herpes zoster, intestinal obstruction, kidney infection, meningitis, orchitis, pericarditis, perforation of small intestine, phlebitis, prostate infection, prostatitis, pyloric ulcer, thrombophlebitis, thyrotoxicosis, thyroiditis, trypanosomiasis, vaginal infection, ventricular fibrillation, vulvar infection, yeast infection                                                                                                                                                                                                                                                                                                                                                                                                                                                                                                                                                                                                                                                                                                                                                                                                                                                                                                                                                                                                                                                                                                                                                                                                                                                                                                 |
| Voluntarily reported chronic conditions with prevalence <0.1% |          | Abnormal pap, acid reflux, acoustic neuroma, Addison's disease, amputation, adenomyosis, adenomyosis leiomyoma, aplastic anemia, asymmetric septal hypertrophy, adrenal gland tumor, agranulocytosis, amputation, aorta iliac obstruction, aortic femoral bypass, arterial embolism, arterial occlusion, arteriosclerosis, atherosclerosis, arteriosclerotic heart disease, atrial flutter, Barlow's syndrome, Bartter's disease, basilar vertebral ischemia, benign tumors (adrenal gland, adrenal medulla, bladder, bowel, brain, chest, eye, gall bladder, kidney, liver, neck, nerve, ovarian, parathyroid gland, parotid, pelvic, pituitary gland, prostate, salivary gland, schwannoma, testicle, thyroid, unspecified, uterine), bladder polyp, blocked femoral artery, blood clot, breast augmentation, breast implants, Bright's disease, bone marrow dysplasia, bowel adhesions, bowel resection, bowel volvulus, Bowen's disease, brachial neuritis, bradycardia, bronchial asthma, bulbar palsy, bundle branch block, calcification of aorta, carcinoid syndrome, cardiac arrhythmia, cardiac enlargement, cardiac hypertrophy, cardiac insufficiency, cardiomyopathy, carotid artery blockage, carotid artery disease, carotid bruit, carotid dissection, carotid lesion, carotid stenosis, celiac disease, central vein occlusion, cerebral aneurysm, cerebral ischemia, cervical disc, cervical dysplasia, cervical laminectomy, cervical polyp, Charcot-Marie Tooth, chronic endocarditis, chronic Epstein-Barr virus, chronic functional bowel syndrome, chronic ischemic heart disease, coarctation of aorta, colectomy, Colles fracture, colon resection, colostomy, conduction heart attack, congenital heart disease, congenital pulmonary stenosis, corneal transplant, coronary artery spasm, coronary insufficiency, coronary stenosis, Cushing's syndrome, cystadenoma, cystic ovary, degenerative disc |

|  |  |                                                                                                                                                                                                                                                                                                                                                                                                                                                                                                                                                                                                                                                                                                                                                                                                                                                                                                                                                                                                                                                                                                                                                                                                                                                                                                                                                                                                                                                                                                                                                                                                                                                                                                                                                                                                                                                                                                                                                                                                                                                                                                                                                                                                                                                                                                                                                                                                                                                                                                                                                                                                                                                                                                                                                                        |
|--|--|------------------------------------------------------------------------------------------------------------------------------------------------------------------------------------------------------------------------------------------------------------------------------------------------------------------------------------------------------------------------------------------------------------------------------------------------------------------------------------------------------------------------------------------------------------------------------------------------------------------------------------------------------------------------------------------------------------------------------------------------------------------------------------------------------------------------------------------------------------------------------------------------------------------------------------------------------------------------------------------------------------------------------------------------------------------------------------------------------------------------------------------------------------------------------------------------------------------------------------------------------------------------------------------------------------------------------------------------------------------------------------------------------------------------------------------------------------------------------------------------------------------------------------------------------------------------------------------------------------------------------------------------------------------------------------------------------------------------------------------------------------------------------------------------------------------------------------------------------------------------------------------------------------------------------------------------------------------------------------------------------------------------------------------------------------------------------------------------------------------------------------------------------------------------------------------------------------------------------------------------------------------------------------------------------------------------------------------------------------------------------------------------------------------------------------------------------------------------------------------------------------------------------------------------------------------------------------------------------------------------------------------------------------------------------------------------------------------------------------------------------------------------|
|  |  | <p>disease, demyelinating disease, dermoid tumor, detached retina, diabetes insipidus, discectomy, duodenitis, dysplastic nevus syndrome, eczema, enchondroma, endometrial hyperplasia, endometrial polyp, endometriomas, endometriosis, endometritis, enlarged thyroid, epidural hematoma, esophageal ulcer, esophagitis, facial paralysis, fallopian fibroid, familial polyposis, fatty liver, femoral aneurysm, femoral popliteal bypass, fibrillating heart, fibromyositis, fibrositis, fibular fracture, fracture of leg, functional disorder of the intestine, gall bladder adenoma, gall bladder polyp, gastrectomy, gastric bypass, gastric reflux, gastroesophageal reflux disease, gastritis, gastrointestinal bleeding, Gaucher disease, genital prolapse, goiter, Guillain-Barre syndrome, human T-cell lymphotropic virus, heart block, heart irregularity, heart rhythm disorder, heart spasm, heart transplant, hemicolecotomy, hemochromatosis, hernia, herniated disc, hyperplasia, hyperparathyroidism, hypoadrenocortism, hypokalemia, hypodynamic heart, hypoparathyroidism, idiopathic hypertrophic subaortic stenosis, idiopathic thrombocytopenia, idiopathic thrombocytopenic purpura, inguinal hernia, koilocytosis of cervix, laminectomy, lateral sclerosis, left anterior descending stenosis, left bundle branch block, left ventricular failure, leukopenia, Lou Gehrig's disease, lumbar disc disease, meningioma, mesenteric artery infarction, microadenoma, motor neuron disease, muscular dystrophy, myasthenia gravis, myelodysplasia, myelofibrosis, myeloproliferative syndrome, myomectomy, myositis, myotonic dystrophy, myxedema, nephrectomy, neurofibroma, neuroma, nocturnal seizures, nodular thyroid, non-articular rheumatism, non-motor vehicle accident, non-toxic nodular goiter, non-toxic thyroid adenoma, non-articular rheumatism, obstructed kidney, other endocardiac structure disease, otosclerosis, ovarian cyst, ovarian polyp, pacemaker insertion, pancreas transplant, parathyroid disease, parotidectomy, paroxysmal atrial tachycardia, paroxysmal hemicranias, paroxysmal tachycardia, Passy-Muir valve, pemphigus, pericarditis, peripheral vascular disease, peripheral vascular surgery, pernicious anemia, pheochromocytoma, pituitary disease, pleomorphic adenoma, polyarteritis nodosa, polycythemia vera, polymyalgia rheumatic, polynephritis, polyneuritis, polyradiculitis, post-polio syndrome, premature ventricular contractions, progressive supranuclear palsy, pulmonary edema, pulmonary heart disease, pyloric ulcer, Raynaud's disease, Reiter's syndrome, renal artery occlusion, retinal detachment, retinal vein occlusion, ruptured disc, sarcoidosis, sarcoid of lungs,</p> |
|--|--|------------------------------------------------------------------------------------------------------------------------------------------------------------------------------------------------------------------------------------------------------------------------------------------------------------------------------------------------------------------------------------------------------------------------------------------------------------------------------------------------------------------------------------------------------------------------------------------------------------------------------------------------------------------------------------------------------------------------------------------------------------------------------------------------------------------------------------------------------------------------------------------------------------------------------------------------------------------------------------------------------------------------------------------------------------------------------------------------------------------------------------------------------------------------------------------------------------------------------------------------------------------------------------------------------------------------------------------------------------------------------------------------------------------------------------------------------------------------------------------------------------------------------------------------------------------------------------------------------------------------------------------------------------------------------------------------------------------------------------------------------------------------------------------------------------------------------------------------------------------------------------------------------------------------------------------------------------------------------------------------------------------------------------------------------------------------------------------------------------------------------------------------------------------------------------------------------------------------------------------------------------------------------------------------------------------------------------------------------------------------------------------------------------------------------------------------------------------------------------------------------------------------------------------------------------------------------------------------------------------------------------------------------------------------------------------------------------------------------------------------------------------------|

|                                                                                 |                                                                                                                                                                                                                                                                                                                                                                                                                                                                                                                                                                                                                              |                                                                                                                                                                                                                                                                                                                                                                                                                                                                                                                                                                                                                                                                                                                                                                                                                                                                                                                                                                                                                             |
|---------------------------------------------------------------------------------|------------------------------------------------------------------------------------------------------------------------------------------------------------------------------------------------------------------------------------------------------------------------------------------------------------------------------------------------------------------------------------------------------------------------------------------------------------------------------------------------------------------------------------------------------------------------------------------------------------------------------|-----------------------------------------------------------------------------------------------------------------------------------------------------------------------------------------------------------------------------------------------------------------------------------------------------------------------------------------------------------------------------------------------------------------------------------------------------------------------------------------------------------------------------------------------------------------------------------------------------------------------------------------------------------------------------------------------------------------------------------------------------------------------------------------------------------------------------------------------------------------------------------------------------------------------------------------------------------------------------------------------------------------------------|
|                                                                                 |                                                                                                                                                                                                                                                                                                                                                                                                                                                                                                                                                                                                                              | sick sinus syndrome, simple goiter, sinus re-entry tachycardia, sinus tachycardia, slipped disc, spinal fusion, spinal stenosis, subdural hematoma, supranuclear palsy, symptomatic heart disease, synovitis, tachycardia, temporal arteritis, Tetralogy of Fallot, toxic thyroid adenoma, thrombocytopenia purpura, thrombosis, thyroid cyst, thyroid papilloma, thyroidectomy, tibia fracture, tic douloureux, trigeminal neuralgia, toxic thyroid adenoma, tubular nephrosis, unspecified disorders of the heart, ureteral stenosis, ureteral stone, uterine adenomyosis, uterine cyst, uterine descensus, uterine dysplasia, uterine hyperplasia, uterine polyp, uterine prolapse, uveitis, vaginal enterocele, vaginal wall prolapse, valve implant, vascular surgery, vasculitis, venous insufficiency, ventral hernia, ventricular ectopy, ventricular hypertrophy, ventricular irritability, ventricular premature beats, vertebral fracture, volvulus, von Willebrand disease, Warthin tumor, Wolf Parkinson White |
| Voluntarily reported conditions that were combined                              | <ul style="list-style-type: none"> <li>Chronic kidney disease (glomerulonephritis, kidney disease, kidney failure, kidney transplant, renal artery occlusion, renal artery stenosis, renal failure)</li> <li>Cirrhosis and liver transplant</li> <li>Hepatitis and hepatocellular disease</li> <li>Valvular heart disease (aortic insufficiency, aortic valve disease, aortic valve replacement, aortic valve stenosis, aortic and mitral valve disorder, mitral regurgitation, mitral stenosis, mitral valve disease, mitral valve replacement, pulmonary valve disease, tricuspid valve disease, valve implant)</li> </ul> |                                                                                                                                                                                                                                                                                                                                                                                                                                                                                                                                                                                                                                                                                                                                                                                                                                                                                                                                                                                                                             |
| Assessed conditions that were combined                                          | <ul style="list-style-type: none"> <li>Alzheimer disease and other dementias</li> <li>Inflammatory bowel disease (Crohn's disease, ulcerative colitis)</li> <li>Leukemia and lymphoma</li> <li>Venous thromboembolism (pulmonary embolism and deep venous thrombosis)</li> </ul>                                                                                                                                                                                                                                                                                                                                             |                                                                                                                                                                                                                                                                                                                                                                                                                                                                                                                                                                                                                                                                                                                                                                                                                                                                                                                                                                                                                             |
| Combined conditions from both voluntary reporting and assessed in questionnaire | <ul style="list-style-type: none"> <li>Connective tissue diseases (Sjogren disease, dermatomyositis, polymyositis, systemic lupus erythematosus)</li> <li>Seizure disorder and epilepsy</li> </ul>                                                                                                                                                                                                                                                                                                                                                                                                                           | <ul style="list-style-type: none"> <li>Hyperthyroidism and Grave's disease</li> </ul>                                                                                                                                                                                                                                                                                                                                                                                                                                                                                                                                                                                                                                                                                                                                                                                                                                                                                                                                       |
| Conditions with positive coefficients                                           |                                                                                                                                                                                                                                                                                                                                                                                                                                                                                                                                                                                                                              | <ul style="list-style-type: none"> <li>Basal cell carcinoma</li> <li>Benign breast disease</li> <li>Benign prostatic hypertrophy (BPH)</li> <li>Ectopic pregnancy</li> <li>Melanoma</li> <li>Prostate surgery for BPH</li> </ul>                                                                                                                                                                                                                                                                                                                                                                                                                                                                                                                                                                                                                                                                                                                                                                                            |

|                                                                                                                   |                                                                                                                                                                                   |                                                                                                                                                                    |
|-------------------------------------------------------------------------------------------------------------------|-----------------------------------------------------------------------------------------------------------------------------------------------------------------------------------|--------------------------------------------------------------------------------------------------------------------------------------------------------------------|
|                                                                                                                   |                                                                                                                                                                                   | <ul style="list-style-type: none"> <li>• Squamous cell carcinoma</li> <li>• Solar actinic keratosis</li> <li>• Thyroid nodule</li> <li>• Wrist fracture</li> </ul> |
| Conditions without sufficiently stable coefficients (standard error greater than estimate)                        |                                                                                                                                                                                   | <ul style="list-style-type: none"> <li>• Hyperthyroidism and Grave's disease</li> <li>• Mitral valve prolapse</li> <li>• Uterine fibroid</li> </ul>                |
| Conditions without sufficiently stable coefficients that could be estimated from the median of similar conditions | <ul style="list-style-type: none"> <li>• Bladder cancer</li> <li>• Cirrhosis and liver transplant</li> </ul>                                                                      |                                                                                                                                                                    |
| Conditions without sufficiently stable coefficients included due to inclusion in other comorbidity indices        | <ul style="list-style-type: none"> <li>• Hepatitis and hepatocellular disease</li> </ul>                                                                                          |                                                                                                                                                                    |
| Summary of voluntarily reported conditions included in multimorbidity weighted index                              | <ul style="list-style-type: none"> <li>• AIDS</li> <li>• Cirrhosis and liver transplant</li> <li>• Hepatitis</li> <li>• Pancreatitis</li> <li>• Valvular heart disease</li> </ul> |                                                                                                                                                                    |

**Web Table 2.** Self-reported clinician-diagnosed diseases and conditions and adjusted association with the Short Form-36 physical functioning scale in the pooled Nurses' Health Study, Nurses' Health Study II, and Health Professionals Follow-up Study cohorts from 1992-2008.

| Condition                                               | number | % <sup>a</sup> | Fixed weighted,<br>n = 612,592 |                |         | Nurses' Health Study,<br>n = 299,003 |                |         | Nurses' Health Study II,<br>n = 251,222 |                |         | Health Professionals Follow-up Study,<br>n = 62,367 |                |         |
|---------------------------------------------------------|--------|----------------|--------------------------------|----------------|---------|--------------------------------------|----------------|---------|-----------------------------------------|----------------|---------|-----------------------------------------------------|----------------|---------|
|                                                         |        |                | Coefficient <sup>b</sup>       | Standard error | p-value | Coefficient <sup>b</sup>             | Standard error | p-value | Coefficient <sup>b</sup>                | Standard error | p-value | Coefficient <sup>b</sup>                            | Standard error | p-value |
| Other diagnosis                                         | 68626  | 11.3           | -1.46                          | 0.039          | <0.0001 | -1.71                                | 0.059          | <0.0001 | -1.17                                   | 0.060          | <0.0001 | -1.56                                               | 0.107          | <0.0001 |
| Cardiovascular                                          |        |                |                                |                |         |                                      |                |         |                                         |                |         |                                                     |                |         |
| Angina                                                  | 22905  | 3.8            | -2.20                          | 0.076          | <0.0001 | -2.23                                | 0.096          | <0.0001 | -2.15                                   | 0.172          | <0.0001 | -1.09                                               | 0.148          | <0.0001 |
| Aortic aneurysm                                         | 1310   | 0.2            | -1.96                          | 0.230          | <0.0001 | -1.64                                | 0.588          | 0.0053  | N/A                                     | N/A            | N/A     | -2.02                                               | 0.261          | <0.0001 |
| Atrial fibrillation                                     | 14463  | 2.7            | -1.33                          | 0.089          | <0.0001 | -1.43                                | 0.101          | <0.0001 | N/A                                     | N/A            | N/A     | -0.996                                              | 0.186          | <0.0001 |
| Automated Implantable Cardioverter Defibrillator (AICD) | 136    | 0.03           | -1.57                          | 0.810          | 0.05    | -1.57                                | 0.809          | 0.053   | N/A                                     | N/A            | N/A     | N/A                                                 | N/A            | N/A     |
| Congestive heart failure                                | 3442   | 0.6            | -4.77                          | 0.165          | <0.0001 | -4.61                                | 0.189          | <0.0001 | N/A                                     | N/A            | N/A     | -5.21                                               | 0.3333         | <0.0001 |
| Coronary artery bypass graft surgery                    | 15923  | 3.0            | -0.724                         | 0.088          | <0.0001 | -0.853                               | 0.119          | <0.0001 | -1.55                                   | 0.439          | 0.0004  | -0.466                                              | 0.138          | 0.0007  |
| High blood pressure                                     | 176855 | 29.1           | -1.53                          | 0.027          | <0.0001 | -1.48                                | 0.038          | <0.0001 | -1.81                                   | 0.046          | <0.0001 | -1.03                                               | 0.074          | <0.0001 |
| Mitral valve prolapse                                   | 20789  | 3.5            | -0.033                         | 0.074          | 0.66    | N/A                                  | N/A            | N/A     | -0.033                                  | 0.074          | 0.66    | N/A                                                 | N/A            | N/A     |
| Myocardial infarction                                   | 14424  | 2.4            | -1.73                          | 0.087          | <0.0001 | -1.90                                | 0.124          | <0.0001 | -2.46                                   | 0.203          | <0.0001 | -1.07                                               | 0.152          | <0.0001 |
| Peripheral artery disease                               | 6841   | 0.9            | -3.25                          | 0.111          | <0.0001 | -3.05                                | 0.125          | <0.0001 | N/A                                     | N/A            | N/A     | -3.99                                               | 0.238          | <0.0001 |
| Valvular heart disease <sup>c</sup>                     | 3522   | 0.6            | -0.416                         | 0.127          | 0.001   | -0.604                               | 0.255          | 0.02    | -0.513                                  | 0.157          | 0.001   | 0.606                                               | 0.387          | 0.12    |
| Endocrine                                               |        |                |                                |                |         |                                      |                |         |                                         |                |         |                                                     |                |         |
| Diabetes                                                | 30610  | 5.0            | -2.67                          | 0.055          | <0.0001 | -3.04                                | 0.074          | <0.0001 | -2.11                                   | 0.105          | <0.0001 | -2.40                                               | 0.129          | <0.0001 |
| Elevated cholesterol                                    | 233871 | 38.5           | -0.343                         | 0.025          | <0.0001 | -0.016                               | 0.038          | 0.67    | -0.838                                  | 0.037          | <0.0001 | 0.618                                               | 0.082          | <0.0001 |
| Hyperthyroidism                                         | 3258   | 0.5            | -0.149                         | 0.099          | 0.13    | -0.392                               | 0.300          | 0.19    | -0.062                                  | 0.116          | 0.59    | N/A                                                 | N/A            | N/A     |
| Hypertriglyceridemia                                    | 18207  | 2.5            | -0.692                         | 0.091          | <0.0001 | N/A                                  | N/A            | N/A     | N/A                                     | N/A            | N/A     | -0.692                                              | 0.091          | <0.0001 |
| Hypothyroidism                                          | 19698  | 3.2            | -0.808                         | 0.055          | <0.0001 | N/A                                  | N/A            | N/A     | -0.808                                  | 0.055          | <0.0001 | N/A                                                 | N/A            | N/A     |
| Thyroid nodule                                          | 5714   | 1.1            | 0.033                          | 0.086          | 0.70    | N/A                                  | N/A            | N/A     | 0.033                                   | 0.086          | 0.70    | N/A                                                 | N/A            | N/A     |
| Gastrointestinal                                        |        |                |                                |                |         |                                      |                |         |                                         |                |         |                                                     |                |         |
| Barrett's esophagus                                     | 1260   | 0.3            | -0.284                         | 0.259          | 0.27    | -0.877                               | 0.375          | 0.019   | N/A                                     | N/A            | N/A     | 0.253                                               | 0.357          | 0.48    |
| Chronic hepatitis, hepatocellular                       | 675    | 0.1            | -0.293                         | 0.256          | 0.25    | -1.92                                | 0.974          | 0.048   | -0.323                                  | 0.287          | 0.26    | 0.711                                               | 0.696          | 0.31    |

|                                                                     |        |      |        |       |                |        |       |         |        |       |         |        |       |         |
|---------------------------------------------------------------------|--------|------|--------|-------|----------------|--------|-------|---------|--------|-------|---------|--------|-------|---------|
| disease <sup>c</sup>                                                |        |      |        |       |                |        |       |         |        |       |         |        |       |         |
| Cirrhosis, liver transplant <sup>c</sup>                            | 164    | 0.03 | 0.199  | 0.729 | 0.78           | -0.053 | 0.937 | 0.95    | 1.06   | 1.62  | 0.51    | 0.090  | 1.66  | 0.96    |
| Colon polyp                                                         | 29766  | 4.9  | -0.010 | 0.046 | 0.82           | 0.098  | 0.060 | 0.10    | -0.540 | 0.102 | <0.0001 | 0.206  | 0.101 | 0.04    |
| Diverticulosis, diverticulitis                                      | 30481  | 4.2  | -0.624 | 0.057 | <0.0001        | -0.650 | 0.066 | <0.0001 | N/A    | N/A   | N/A     | -0.550 | 0.113 | <0.0001 |
| Gallstones                                                          | 13482  | 2.2  | -0.929 | 0.051 | <0.0001        | N/A    | N/A   | N/A     | -1.04  | 0.062 | <0.0001 | -0.691 | 0.091 | <0.0001 |
| Hepatitis <sup>c</sup>                                              | 414    | 0.1  | -0.147 | 0.240 | 0.54           | -0.633 | 0.595 | 0.288   | -0.148 | 0.272 | 0.59    | 1.15   | 0.973 | 0.23    |
| Inflammatory bowel disease                                          | 7138   | 1.2  | -1.07  | 0.107 | <0.0001        | -0.676 | 0.175 | 0.0001  | -1.46  | 0.150 | <0.0001 | -0.619 | 0.309 | 0.04    |
| Pancreatitis <sup>c</sup>                                           | 414    | 0.1  | -0.675 | 0.336 | 0.04           | 0.399  | 0.561 | 0.477   | -1.63  | 0.449 | 0.0003  | 1.20   | 1.19  | 0.32    |
| Ulcer, peptic                                                       | 18199  | 3.0  | -1.08  | 0.064 | <0.0001        | -1.19  | 0.110 | <0.0001 | -1.03  | 0.086 | <0.0001 | -1.01  | 0.184 | <0.0001 |
|                                                                     |        |      |        |       |                |        |       |         |        |       |         |        |       |         |
|                                                                     |        |      |        |       |                |        |       |         |        |       |         |        |       |         |
| Hematologic                                                         |        |      |        |       |                |        |       |         |        |       |         |        |       |         |
| Pernicious anemia                                                   | 1337   | 0.3  | -1.82  | 0.259 | <0.0001        | -1.67  | 0.289 | <0.0001 | N/A    | N/A   | N/A     | -2.44  | 0.587 | <0.0001 |
| Venous thrombo-embolism (pulmonary embolus, deep venous thrombosis) | 10472  | 1.7  | -1.98  | 0.084 | <0.0001        | -2.79  | 0.180 | <0.0001 | -1.71  | 0.099 | <0.0001 | -2.12  | 0.289 | <0.0001 |
|                                                                     |        |      |        |       |                |        |       |         |        |       |         |        |       |         |
|                                                                     |        |      |        |       |                |        |       |         |        |       |         |        |       |         |
| Immunologic                                                         |        |      |        |       |                |        |       |         |        |       |         |        |       |         |
| Acquired Immune Deficiency Syndrome (AIDS) <sup>c</sup>             | 31     | 0.01 | -2.91  | 1.26  | 0.02<br>0.0210 | -11.9  | 3.76  | 0.002   | -1.63  | 1.53  | 0.29    | -2.22  | 2.75  | 0.42    |
|                                                                     |        |      |        |       |                |        |       |         |        |       |         |        |       |         |
|                                                                     |        |      |        |       |                |        |       |         |        |       |         |        |       |         |
| Integumentary                                                       |        |      |        |       |                |        |       |         |        |       |         |        |       |         |
| Solar actinic keratosis                                             | 9288   | 1.3  | 0.774  | 0.097 | <0.0001        | N/A    | N/A   | N/A     | N/A    | N/A   | N/A     | 0.774  | 0.097 | <0.0001 |
|                                                                     |        |      |        |       |                |        |       |         |        |       |         |        |       |         |
|                                                                     |        |      |        |       |                |        |       |         |        |       |         |        |       |         |
| Musculoskeletal                                                     |        |      |        |       |                |        |       |         |        |       |         |        |       |         |
| Connective tissue disease                                           | 4373   | 0.7  | -3.02  | 0.128 | <0.0001        | -2.33  | 0.180 | <0.0001 | -3.72  | 0.182 | <0.0001 | N/A    | N/A   | N/A     |
| Gout                                                                | 5314   | 2.5  | -1.34  | 0.119 | <0.0001        | -3.50  | 0.293 | <0.0001 | -1.43  | 0.296 | <0.0001 | -0.808 | 0.144 | <0.0001 |
| Herniated disc                                                      | 42734  | 7.1  | -3.27  | 0.042 | <0.0001        | -3.01  | 0.086 | <0.0001 | -3.35  | 0.047 | <0.0001 | N/A    | N/A   | N/A     |
| Hip fracture                                                        | 5571   | 0.8  | -3.56  | 0.122 | <0.0001        | -3.56  | 0.122 | <0.0001 | N/A    | N/A   | N/A     | N/A    | N/A   | N/A     |
| Hip replacement surgery                                             | 8191   | 1.1  | -3.55  | 0.104 | <0.0001        | -3.55  | 0.104 | <0.0001 | N/A    | N/A   | N/A     | -3.53  | N/A   | <0.0001 |
| Knee replacement surgery                                            | 1943   | 0.3  | -9.11  | 0.317 | <0.0001        | -9.11  | 0.317 | <0.0001 | N/A    | N/A   | N/A     | N/A    | N/A   | N/A     |
| Osteo-arthritis                                                     | 149180 | 24.5 | -3.52  | 0.030 | <0.0001        | -3.61  | 0.041 | <0.0001 | -3.68  | 0.049 | <0.0001 | -2.65  | 0.086 | <0.0001 |
| Osteoporosis                                                        | 47879  | 6.6  | -0.997 | 0.049 | <0.0001        | -0.971 | 0.050 | <0.0001 | N/A    | N/A   | N/A     | -1.58  | 0.237 | <0.0001 |
| Rheumatoid arthritis                                                | 25811  | 4.2  | -3.79  | 0.062 | <0.0001        | -3.74  | 0.081 | <0.0001 | -4.36  | 0.117 | <0.0001 | -2.76  | 0.171 | <0.0001 |
| Vertebral fracture                                                  | 8338   | 1.1  | -2.07  | 0.191 | <0.0001        | -2.066 | 0.191 | <0.0001 | N/A    | N/A   | N/A     | N/A    | N/A   | N/A     |

|                                      |       |      |        |       |         |        |       |         |                |       |         |        |       |         |
|--------------------------------------|-------|------|--------|-------|---------|--------|-------|---------|----------------|-------|---------|--------|-------|---------|
| Wrist fracture                       | 15165 | 2.1  | 0.173  | 0.088 | 0.04    | 0.173  | 0.088 | 0.04    | N/A            | N/A   | N/A     | N/A    | N/A   | N/A     |
| Nervous                              |       |      |        |       |         |        |       |         |                |       |         |        |       |         |
| Amyotrophic lateral sclerosis (ALS)  | 152   | 0.02 | -7.45  | 0.759 | <0.0001 | -7.29  | 0.789 | <0.0001 | N/A            | N/A   | N/A     | -9.42  | 2.79  | 0.0007  |
| Dementia including Alzheimer disease | 305   | 0.1  | -6.10  | 0.440 | <0.0001 | -5.64  | 0.471 | <0.0001 | N/A            | N/A   | N/A     | -9.23  | 1.23  | <0.0001 |
| Migraine                             | 24990 | 4.2  | -0.614 | 0.064 | <0.0001 | N/A    | N/A   | N/A     | -0.614 (0.064) | 0.064 | <0.0001 | N/A    | N/A   | N/A     |
| Multiple sclerosis                   | 3210  | 0.5  | -10.6  | 0.155 | <0.0001 | -12.5  | 0.281 | <0.0001 | -9.60          | 0.189 | <0.0001 | -14.30 | 0.901 | <0.0001 |
| Parkinson Disease                    | 1355  | 0.2  | -8.82  | 0.263 | <0.0001 | -9.44  | 0.391 | <0.0001 | N/A            | N/A   | N/A     | -8.31  | 0.357 | <0.0001 |
| Restless legs syndrome               | 5799  | 1.4  | -2.23  | 0.111 | <0.0001 | N/A    | N/A   | N/A     | -2.72          | 0.171 | <0.0001 | -1.87  | 0.147 | <0.0001 |
| Seizure disorder                     | 2197  | 1.2  | -0.841 | 0.160 | <0.0001 | -1.24  | 0.398 | 0.0018  | -0.739         | 0.180 | <0.0001 | -1.21  | 0.763 | 0.11    |
| Stroke                               | 6863  | 1.1  | -3.79  | 0.108 | <0.0001 | -4.46  | 0.159 | <0.0001 | -2.37          | 0.207 | <0.0001 | -3.98  | 0.239 | <0.0001 |
| Transient ischemic attack            | 10059 | 1.4  | -1.24  | 0.097 | <0.0001 | -1.34  | 0.116 | <0.0001 | N/A            | N/A   | N/A     | -1.03  | 0.175 | <0.0001 |
| Oncologic                            |       |      |        |       |         |        |       |         |                |       |         |        |       |         |
| Basal cell carcinoma                 | 37003 | 6.1  | 0.246  | 0.043 | <0.0001 | 0.190  | 0.056 | 0.0007  | 0.357          | 0.094 | 0.0002  | 0.301  | 0.099 | 0.003   |
| Bladder cancer                       | 416   | 0.1  | -0.279 | 0.453 | 0.54    | N/A    | N/A   | N/A     | N/A            | N/A   | N/A     | -0.279 | 0.453 | 0.54    |
| Breast cancer                        | 18658 | 3.1  | -0.886 | 0.070 | <0.0001 | -0.639 | 0.080 | <0.0001 | -1.70          | 0.145 | <0.0001 | N/A    | N/A   | N/A     |
| Cervical cancer                      | 3353  | 0.5  | -0.723 | 0.231 | 0.002   | -0.723 | 0.231 | 0.002   | N/A            | N/A   | N/A     | N/A    | N/A   | N/A     |
| Colon cancer                         | 4307  | 0.6  | -1.18  | 0.146 | <0.0001 | -1.18  | 0.181 | <0.0001 | N/A            | N/A   | N/A     | -1.18  | 0.247 | <0.0001 |
| Leukemia, lymphoma                   | 854   | 0.2  | -1.32  | 0.293 | <0.0001 | -0.329 | 0.746 | 0.6588  | N/A            | N/A   | N/A     | -1.47  | 0.318 | <0.0001 |
| Lung cancer                          | 1147  | 0.2  | -6.25  | 0.258 | <0.0001 | -6.25  | 0.258 | <0.0001 | N/A            | N/A   | N/A     | N/A    | N/A   | N/A     |
| Melanoma                             | 4247  | 0.7  | 0.055  | 0.118 | 0.64    | -0.020 | 0.167 | 0.90    | 0.003          | 0.233 | 0.99    | 0.268  | 0.239 | 0.26    |
| Other cancer                         | 11948 | 2.0  | -1.76  | 0.078 | <0.0001 | -2.64  | 0.131 | <0.0001 | -1.20          | 0.114 | <0.0001 | -1.47  | 0.190 | <0.0001 |
| Ovarian cancer                       | 1386  | 0.2  | -1.87  | 0.274 | <0.0001 | -1.87  | 0.274 | <0.0001 | N/A            | N/A   | N/A     | N/A    | N/A   | N/A     |
| Prostate cancer                      | 5061  | 8.1  | -0.402 | 0.126 | 0.001   | N/A    | N/A   | N/A     | N/A            | N/A   | N/A     | -0.402 | 0.126 | 0.001   |
| Squamous cell carcinoma              | 15011 | 2.5  | 0.068  | 0.067 | 0.31    | 0.142  | 0.085 | 0.09    | 0.043          | 0.192 | 0.82    | -0.085 | 0.129 | 0.51    |
| Uterine cancer                       | 4187  | 0.6  | -0.753 | 0.164 | 0.02    | -0.753 | 0.164 | 0.02    | N/A            | N/A   | N/A     | N/A    | N/A   | N/A     |
| Ophthalmologic                       |       |      |        |       |         |        |       |         |                |       |         |        |       |         |
| Cataract                             | 59460 | 8.2  | -0.288 | 0.037 | <0.0001 | -0.300 | 0.040 | <0.0001 | N/A            | N/A   | N/A     | -0.221 | 0.096 | 0.02    |
| Glaucoma                             | 17059 | 2.3  | -0.427 | 0.086 | <0.0001 | -0.469 | 0.102 | <0.0001 | N/A            | N/A   | N/A     | -0.328 | 0.156 | 0.03    |
| Macular degeneration                 | 14193 | 2.0  | -0.564 | 0.082 | <0.0001 | -0.570 | 0.094 | <0.0001 | N/A            | N/A   | N/A     | -0.547 | 0.168 | 0.001   |
| Oral                                 |       |      |        |       |         |        |       |         |                |       |         |        |       |         |
| Periodontal disease                  | 32171 | 5.6  | -0.164 | 0.063 | 0.009   | 0.380  | 0.130 | 0.003   | N/A            | N/A   | N/A     | -0.333 | 0.072 | <0.0001 |
| Psychiatric                          |       |      |        |       |         |        |       |         |                |       |         |        |       |         |
| Alcohol abuse                        | 3492  | 0.5  | -1.37  | 0.196 | <0.0001 | -1.31  | 0.260 | <0.0001 | N/A            | N/A   | N/A     | -1.46  | 0.297 | <0.0001 |
| Depression                           | 53886 | 20.8 | -1.29  | 0.042 | <0.0001 | -2.46  | 0.091 | <0.0001 | -0.934         | 0.049 | <0.0001 | -1.51  | 0.174 | <0.0001 |

|                                                   |        |      |        |       |         |        |       |         |        |       |         |        |       |         |
|---------------------------------------------------|--------|------|--------|-------|---------|--------|-------|---------|--------|-------|---------|--------|-------|---------|
| Pulmonary                                         |        |      |        |       |         |        |       |         |        |       |         |        |       |         |
| Asthma                                            | 54022  | 8.9  | -1.62  | 0.040 | <0.0001 | -1.69  | 0.070 | <0.0001 | -1.78  | 0.053 | <0.0001 | -0.262 | 0.138 | 0.05    |
| Chronic obstructive pulmonary disease (COPD)      | 15771  | 3.5  | -4.32  | 0.078 | <0.0001 | -4.20  | 0.092 | <0.0001 | -4.30  | 0.248 | <0.0001 | -5.00  | 0.208 | <0.0001 |
| Renal                                             |        |      |        |       |         |        |       |         |        |       |         |        |       |         |
| Chronic kidney disease                            | 722    | 0.1  | -3.98  | 0.330 | <0.0001 | -3.86  | 0.512 | <0.0001 | N/A    | N/A   | N/A     | -4.07  | 0.432 | <0.0001 |
| Interstitial cystitis                             | 1964   | 0.4  | -0.879 | 0.203 | <0.0001 | -0.849 | 0.268 | 0.001   | -0.920 | 0.312 | 0.003   | N/A    | N/A   | N/A     |
| Kidney stones                                     | 19022  | 3.1  | -0.291 | 0.054 | <0.0001 | -0.254 | 0.085 | 0.003   | -0.393 | 0.084 | <0.0001 | -0.137 | 0.130 | 0.29    |
| Reproductive                                      |        |      |        |       |         |        |       |         |        |       |         |        |       |         |
| Benign breast disease                             | 133271 | 21.9 | 0.107  | 0.022 | <0.0001 | 0.164  | 0.036 | 0.0002  | 0.071  | 0.028 | 0.012   | N/A    | N/A   | N/A     |
| Benign prostatic hyperplasia (BPH)                | 360    | 0.6  | 2.10   | 0.464 | <0.0001 | N/A    | N/A   | N/A     | N/A    | N/A   | N/A     | 2.10   | 0.464 | <0.0001 |
| Ectopic pregnancy                                 | 2767   | 0.5  | 0.131  | 0.116 | 0.26    | N/A    | N/A   | N/A     | 0.131  | 0.116 | 0.25    | N/A    | N/A   | N/A     |
| Endometriosis                                     | 16667  | 2.7  | -0.142 | 0.051 | 0.006   | N/A    | N/A   | N/A     | -0.142 | 0.051 | 0.006   | N/A    | N/A   | N/A     |
| Erectile dysfunction                              | 18436  | 4.7  | -1.22  | 0.134 | <0.0001 | N/A    | N/A   | N/A     | N/A    | N/A   | N/A     | -1.22  | 0.134 | <0.0001 |
| Polycystic ovary syndrome                         | 20722  | 3.4  | -0.640 | 0.057 | <0.0001 | N/A    | N/A   | N/A     | -0.640 | 0.057 | <0.0001 | N/A    | N/A   | N/A     |
| Premenstrual syndrome                             | 30237  | 5.0  | -0.412 | 0.039 | <0.0001 | N/A    | N/A   | N/A     | -0.412 | 0.038 | <0.0001 | N/A    | N/A   | N/A     |
| Prostate surgery for benign prostatic hyperplasia | 9477   | 15.2 | 0.834  | 0.187 | <0.0001 | N/A    | N/A   | N/A     | N/A    | N/A   | N/A     | 0.834  | 0.187 | <0.0001 |
| Uterine fibroid                                   | 30340  | 5.0  | -0.029 | 0.039 | 0.46    | N/A    | N/A   | N/A     | -0.029 | 0.039 | 0.46    | N/A    | N/A   | N/A     |

<sup>a</sup> Percent prevalence of condition based on the sum of observations from all years and cohorts that each particular condition was assessed and not necessarily the overall sum of observations for all years and all cohorts, as in the case of core non-sex-specific conditions assessed in all years.

<sup>b</sup> Adjusted for age, sex, cohort, and all other chronic diseases and conditions

<sup>c</sup> Diseases and conditions not specifically ascertained in the questionnaire but self-reported by participants

Abbreviations: n, number; N/A, not applicable (sex-specific conditions) or not available (condition not assessed in the cohort)



**Web Figure 1.** Relative difference between coefficient of mean bootstrapped resamplings and original coefficient for the core set of conditions available in all years in at least one cohort among the Nurses' Health Study, Nurses' Health Study II, and Health Professionals Follow-up Study cohorts between 1992-2008.

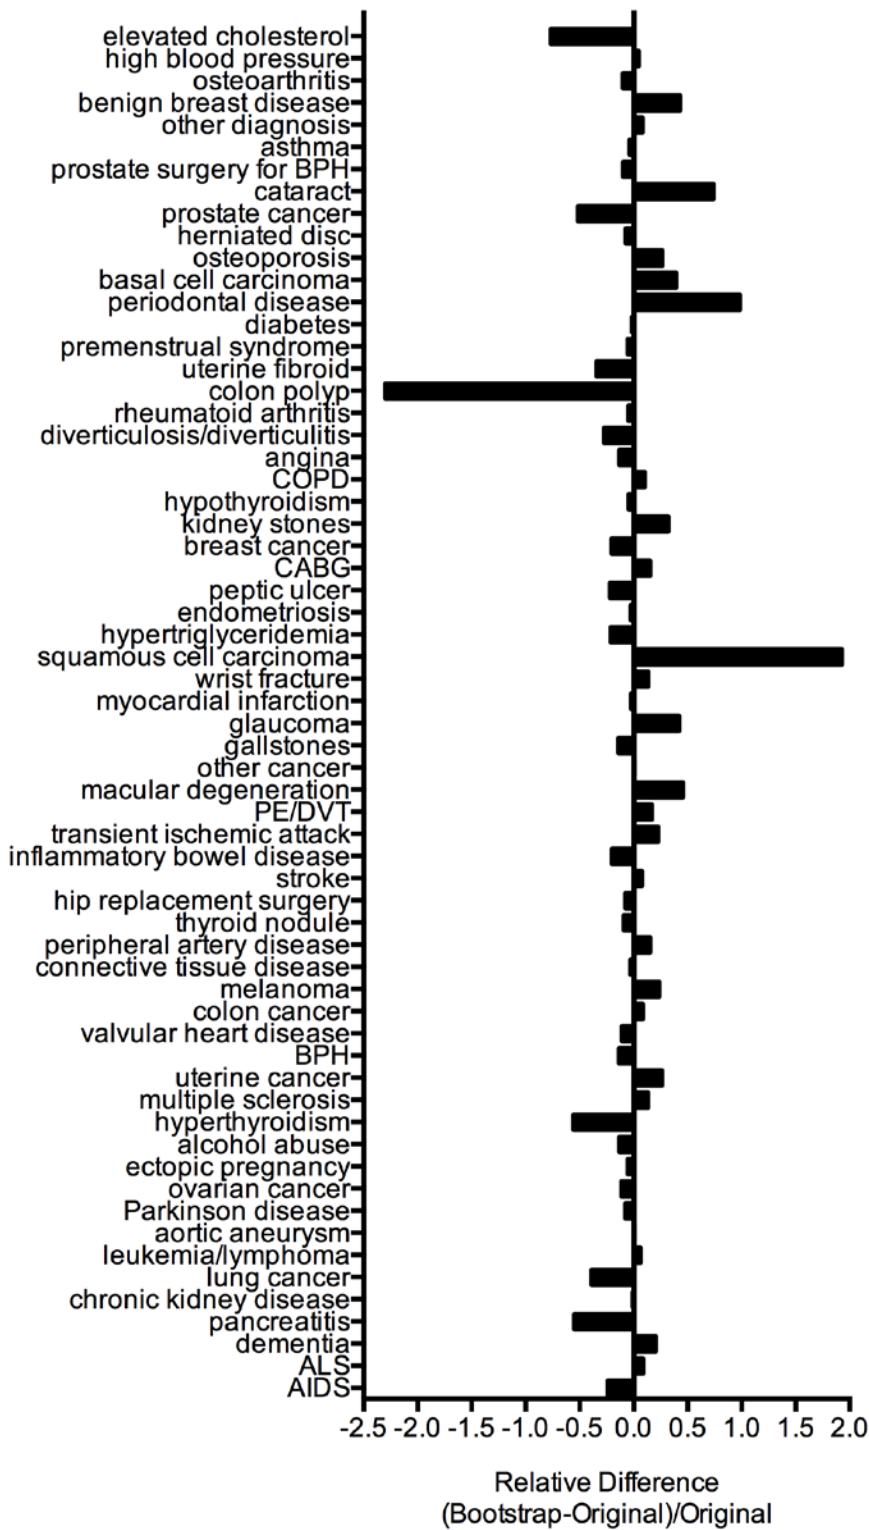

Abbreviations: AIDS, acquired immune deficiency syndrome; ALS, amyotrophic lateral sclerosis; BPH, benign prostatic hyperplasia; DVT, deep venous thrombosis; CABG, coronary artery bypass graft surgery; COPD, chronic obstructive pulmonary disease; PE, pulmonary embolus.

**Web Table 3.** Adjusted estimates of the Short Form-36 physical functioning scale based on the mean of 100 bootstrapped resamplings for conditions assessed in all years in at least one of the Nurses' Health Study, Nurses' Health Study II, or Health Professionals Follow-up Study cohorts between 1992-2008.

| Condition                                                          | Number | % <sup>a</sup> | Coefficient <sup>b</sup><br>from mean<br>bootstrapped<br>resamplings,<br><i>n</i> = 612,592,000 | Standard error | Original<br>coefficient <sup>b</sup> ,<br><i>n</i> = 612,592 | Standard error | Relative<br>difference<br>(Bootstrap-<br>Original)/Origin<br>al | Absolute<br>difference<br>(Bootstrap-<br>Original) |
|--------------------------------------------------------------------|--------|----------------|-------------------------------------------------------------------------------------------------|----------------|--------------------------------------------------------------|----------------|-----------------------------------------------------------------|----------------------------------------------------|
| Elevated cholesterol                                               | 233871 | 38.5           | -0.080                                                                                          | 0.003          | -0.343                                                       | 0.025          | -0.767                                                          | 0.263                                              |
| High blood pressure                                                | 176855 | 29.1           | -1.60                                                                                           | 0.002          | -1.53                                                        | 0.027          | 0.046                                                           | -0.07                                              |
| Osteoarthritis                                                     | 149180 | 24.5           | -3.17                                                                                           | 0.007          | -3.52                                                        | 0.030          | -0.099                                                          | 0.35                                               |
| Benign breast disease                                              | 133271 | 21.9           | 0.153                                                                                           | 0.004          | 0.107                                                        | 0.022          | 0.423                                                           | 0.046                                              |
| Other diagnosis                                                    | 68626  | 11.3           | -1.58                                                                                           | 0.004          | -1.46                                                        | 0.039          | 0.082                                                           | -0.12                                              |
| Asthma                                                             | 54022  | 8.9            | -1.56                                                                                           | 0.004          | -1.62                                                        | 0.040          | -0.037                                                          | 0.06                                               |
| Prostate surgery for benign prostatic hypertrophy                  | 9477   | 15.2           | 0.754                                                                                           | 0.021          | 0.834                                                        | 0.187          | -0.096                                                          | -0.08                                              |
| Cataract                                                           | 59460  | 8.2            | -0.500                                                                                          | 0.009          | -0.288                                                       | 0.037          | 0.736                                                           | -0.212                                             |
| Prostate cancer                                                    | 5061   | 8.1            | -0.195                                                                                          | 0.012          | -0.402                                                       | 0.126          | -0.515                                                          | 0.207                                              |
| Herniated disc                                                     | 42734  | 7.1            | -3.04                                                                                           | 0.352          | -3.27                                                        | 0.042          | -0.070                                                          | 0.23                                               |
| Osteoporosis                                                       | 47879  | 6.6            | -1.26                                                                                           | 0.007          | -0.997                                                       | 0.049          | 0.264                                                           | -0.263                                             |
| Basal cell carcinoma                                               | 37003  | 6.1            | 0.343                                                                                           | 0.006          | 0.246                                                        | 0.043          | 0.394                                                           | 0.097                                              |
| Periodontal disease                                                | 32171  | 5.6            | -0.325                                                                                          | 0.006          | -0.164                                                       | 0.063          | 0.982                                                           | -0.161                                             |
| Diabetes                                                           | 30610  | 5.0            | -2.63                                                                                           | 0.013          | -2.67                                                        | 0.055          | -0.015                                                          | 0.04                                               |
| Premenstrual syndrome                                              | 30237  | 5.0            | -0.390                                                                                          | 0.083          | -0.412                                                       | 0.039          | -0.053                                                          | 0.022                                              |
| Uterine fibroid                                                    | 30340  | 5.0            | -0.019                                                                                          | 0.043          | -0.029                                                       | 0.039          | -0.345                                                          | 0.01                                               |
| Colon polyp                                                        | 29766  | 4.9            | 0.013                                                                                           | 0.006          | -0.010                                                       | 0.046          | -2.30                                                           | 0.023                                              |
| Rheumatoid arthritis                                               | 25811  | 4.2            | -3.61                                                                                           | 0.006          | -3.79                                                        | 0.062          | -0.047                                                          | 0.18                                               |
| Diverticulosis, diverticulitis                                     | 30481  | 4.2            | -0.453                                                                                          | 0.014          | -0.624                                                       | 0.057          | -0.274                                                          | 0.171                                              |
| Angina                                                             | 22905  | 3.8            | -1.91                                                                                           | 0.008          | -2.20                                                        | 0.076          | -0.132                                                          | 0.29                                               |
| Chronic obstructive pulmonary disease                              | 15771  | 3.5            | -4.76                                                                                           | 0.012          | -4.32                                                        | 0.078          | 0.102                                                           | -0.44                                              |
| Hypothyroidism                                                     | 19698  | 3.2            | -0.773                                                                                          | 0.057          | -0.808                                                       | 0.055          | -0.043                                                          | 0.035                                              |
| Kidney stones                                                      | 19022  | 3.1            | -0.384                                                                                          | 0.008          | -0.291                                                       | 0.054          | 0.319                                                           | -0.093                                             |
| Breast cancer                                                      | 18658  | 3.1            | -0.707                                                                                          | 0.008          | -0.886                                                       | 0.070          | -0.202                                                          | 0.179                                              |
| Coronary artery bypass graft surgery (CABG)                        | 15923  | 3.0            | -0.834                                                                                          | 0.011          | -0.724                                                       | 0.088          | 0.152                                                           | -0.11                                              |
| Ulcer, peptic                                                      | 18199  | 3.0            | -0.843                                                                                          | 0.018          | -1.08                                                        | 0.064          | -0.219                                                          | 0.237                                              |
| Endometriosis                                                      | 16667  | 2.7            | -0.116                                                                                          | 0.060          | -0.142                                                       | 0.051          | -0.026                                                          | 0.026                                              |
| Hypertriglyceridemia                                               | 18207  | 2.5            | -0.546                                                                                          | 0.011          | -0.692                                                       | 0.091          | -0.210                                                          | 0.146                                              |
| Squamous cell carcinoma                                            | 15011  | 2.5            | 0.199                                                                                           | 0.007          | 0.068                                                        | 0.067          | 1.93                                                            | 0.131                                              |
| Wrist fracture                                                     | 15165  | 2.1            | 0.196                                                                                           | 0.008          | 0.173                                                        | 0.088          | 0.133                                                           | 0.023                                              |
| Myocardial infarction                                              | 14424  | 2.4            | -1.69                                                                                           | 0.009          | -1.73                                                        | 0.087          | -0.023                                                          | 0.04                                               |
| Glaucoma                                                           | 17059  | 2.3            | -0.606                                                                                          | 0.007          | -0.427                                                       | 0.086          | 0.419                                                           | -0.179                                             |
| Gallstones                                                         | 13482  | 2.2            | -0.801                                                                                          | 0.018          | -0.929                                                       | 0.051          | -0.138                                                          | 0.128                                              |
| Other cancer                                                       | 11948  | 2.0            | -1.77                                                                                           | 0.011          | -1.76                                                        | 0.078          | 0.005                                                           | -0.01                                              |
| Macular degeneration                                               | 14193  | 2.0            | -0.822                                                                                          | 0.009          | -0.564                                                       | 0.082          | 0.457                                                           | -0.258                                             |
| Venous thromboembolism (pulmonary embolus, deep venous thrombosis) | 10472  | 1.7            | -2.31                                                                                           | 0.012          | -1.98                                                        | 0.084          | 0.167                                                           | -0.33                                              |
| Transient ischemic attack                                          | 10059  | 1.4            | -1.52                                                                                           | 0.011          | -1.24                                                        | 0.097          | 0.226                                                           | -0.28                                              |
| Inflammatory bowel disease                                         | 7138   | 1.2            | -0.857                                                                                          | 0.011          | -1.07                                                        | 0.107          | -0.199                                                          | 0.213                                              |

|                                                         |      |      |        |       |        |       |        |        |
|---------------------------------------------------------|------|------|--------|-------|--------|-------|--------|--------|
| Stroke                                                  | 6863 | 1.1  | -4.08  | 0.014 | -3.79  | 0.108 | 0.076  | -0.29  |
| Hip replacement surgery                                 | 8191 | 1.1  | -3.29  | 0.026 | -3.55  | 0.104 | -0.073 | 0.26   |
| Thyroid nodule                                          | 5714 | 1.1  | 0.030  | 0.090 | 0.033  | 0.086 | -0.091 | -0.003 |
| Peripheral artery disease                               | 6841 | 0.9  | -3.74  | 0.017 | -3.25  | 0.111 | 0.151  | -0.49  |
| Connective tissue disease                               | 4373 | 0.7  | -2.93  | 0.018 | -3.02  | 0.128 | -0.030 | 0.09   |
| Melanoma                                                | 4247 | 0.7  | 0.068  | 0.013 | 0.055  | 0.118 | 0.236  | 0.013  |
| Colon cancer                                            | 4307 | 0.6  | -1.28  | 0.016 | -1.18  | 0.146 | 0.085  | -0.1   |
| Valvular heart disease <sup>c</sup>                     | 3522 | 0.6  | -0.372 | 0.014 | -0.416 | 0.127 | -0.105 | 0.044  |
| Benign prostatic hyperplasia                            | 360  | 0.6  | 1.82   | 0.046 | 2.10   | 0.464 | -0.133 | -0.28  |
| Uterine cancer                                          | 4187 | 0.6  | -0.949 | 0.015 | -0.753 | 0.164 | 0.260  | -0.196 |
| Multiple sclerosis                                      | 3210 | 0.5  | -12.0  | 0.030 | -10.6  | 0.155 | 0.132  | -1.40  |
| Hyperthyroidism                                         | 3258 | 0.5  | -0.066 | 0.125 | -0.149 | 0.099 | -0.557 | 0.083  |
| Alcohol abuse                                           | 3492 | 0.5  | -1.19  | 0.035 | -1.37  | 0.196 | -0.131 | 0.18   |
| Ectopic pregnancy                                       | 2767 | 0.5  | 0.124  | 0.130 | 0.131  | 0.116 | -0.053 | -0.007 |
| Ovarian cancer                                          | 1386 | 0.2  | -1.66  | 0.031 | -1.87  | 0.274 | -0.112 | 0.21   |
| Parkinson disease                                       | 1355 | 0.2  | -8.18  | 0.062 | -8.82  | 0.263 | -0.072 | 0.64   |
| Aortic aneurysm                                         | 1310 | 0.2  | -1.97  | 0.035 | -1.96  | 0.230 | 0.005  | -0.01  |
| Leukemia, lymphoma                                      | 854  | 0.2  | -1.40  | 0.036 | -1.32  | 0.293 | 0.061  | -0.08  |
| Lung cancer                                             | 1147 | 0.2  | -5.86  | 0.032 | -6.25  | 0.258 | -0.39  | 0.39   |
| Chronic kidney disease                                  | 722  | 0.1  | -3.96  | 0.069 | -3.98  | 0.330 | -0.005 | 0.02   |
| Pancreatitis <sup>c</sup>                               | 414  | 0.1  | -0.305 | 0.044 | -0.675 | 0.336 | -0.548 | 0.37   |
| Dementia including Alzheimer disease                    | 305  | 0.1  | -7.35  | 0.067 | -6.10  | 0.440 | 0.204  | -1.25  |
| Amyotrophic lateral sclerosis (ALS)                     | 152  | 0.02 | -8.10  | 0.120 | -7.45  | 0.759 | 0.087  | -0.65  |
| Acquired Immune Deficiency Syndrome (AIDS) <sup>c</sup> | 31   | 0.1  | -2.22  | 0.199 | -2.91  | 1.26  | -0.237 | 0.69   |

<sup>a</sup> Percent prevalence of condition based on the sum of observations from all years and cohorts that each particular condition was assessed and not necessarily the overall sum of observations for all years and all cohorts, as in the case of core non-sex-specific conditions assessed in all years.

<sup>b</sup> Adjusted for age, sex, cohort and all other chronic diseases and conditions.

<sup>c</sup> Diseases and conditions not specifically ascertained in the questionnaire but self-reported by participants.
